# Supplementary material for: The chronic toxicity and intergenerational effects of environmental concentration of N-(1,3-dimethylbutyl)-N’- phenyl-p-phenylenediamine (6PPD) alone and the mixture of 6PPD and Zn 2+ to Daphnia magna (Cladocera)
Source: Research Square preprint supplement (doi:10.21203/rs.3.rs-4494679/v1), 2024-06-12
Supplement: Supplementary file 1 [file fbfeeae1df1ae701dcc2fbc1.docx]

**Supplemental Material**


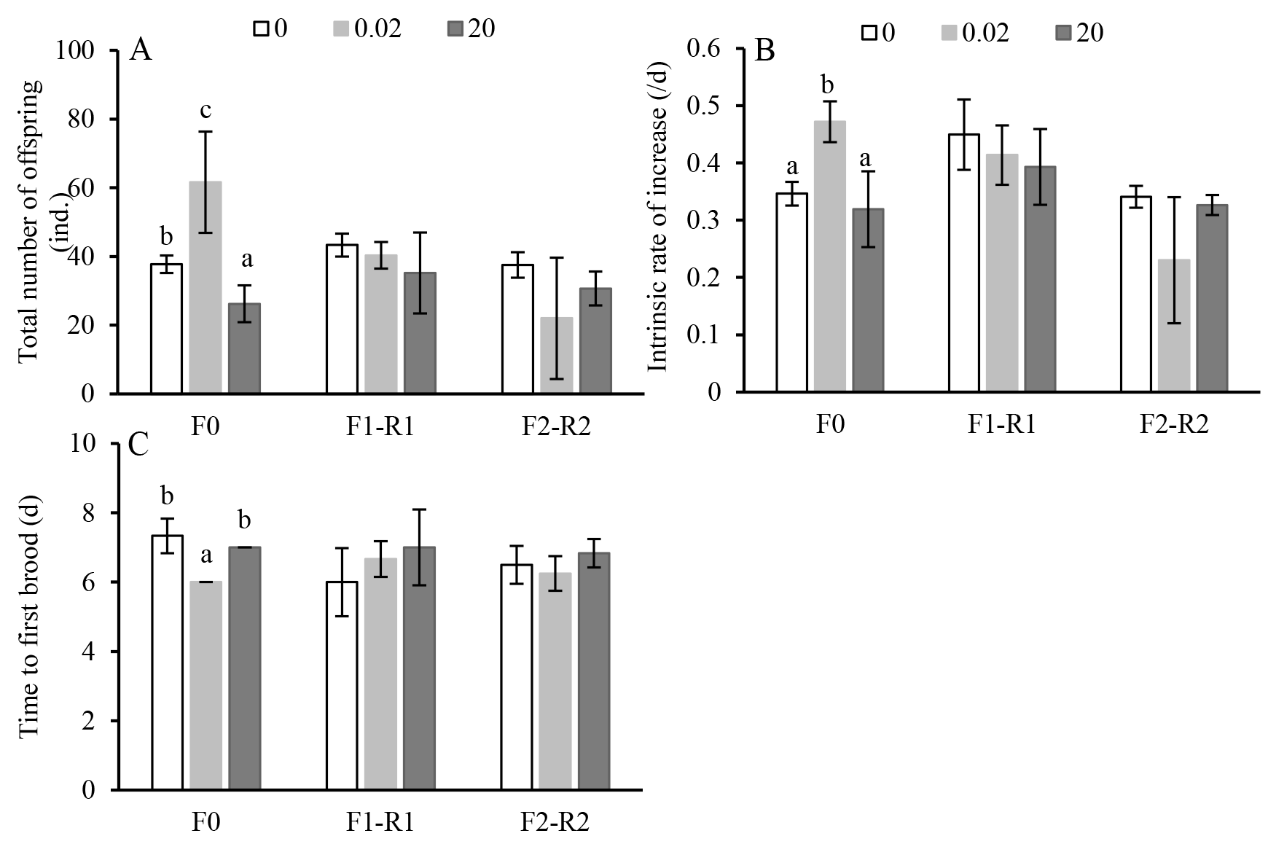


**Fig. S1** Effects of the mixtures of 6PPD on the reproduction parameters of *Daphnia magna* in the bioassay of one-generation exposure along with two-generation recovery. Data are delineated as mean ± standard deviation (n = 10). Different letters indicate significant differences between test groups (*p* < 0.05). Absence of letters indicates no significant differences between the test groups
